# Supplementary material for: Evaluation of Aβ fibrillization inhibitory effect by a PEG–peptide conjugate based on an Aβ peptide fragment with intramolecular FRET
Source: Royal Society of Chemistry journal article supplement (doi:10.1039/c0cc05668e), 2011-01-01
Supplement: c0cc05668e.pdf [file c0cc05668e.pdf]

## Supporting Information for *Chemical Communications*

### Evaluation of A $\beta$ fibrillization inhibitory effect by a PEG-peptide conjugate based on an A $\beta$ peptide fragment with intramolecular FRET

Toshihiko Sakurai,<sup>\*a</sup> Tomoki Iwasaki,<sup>a</sup> Takashi Okuno,<sup>b</sup> Yasushi Kawata,<sup>a</sup> and Naoki Kise<sup>a</sup>

<sup>a</sup> Department of Chemistry and Biotechnology, Graduate School of Engineering, Tottori University, Tottori 680-8552, Japan. Fax: +81 (0)857 31 5633; Tel: +81 (0)857 31 5633; E-mail: sakurai@bio.tottori-u.ac.jp

<sup>b</sup> Graduate School of Medicine and Pharmaceutical Science, University of Toyama, Toyama 930-0194, Japan.

#### I. Experimental Section

##### Synthesis

A PEG-peptide conjugate **1** was synthesized manually by solid phase Fmoc (9-fluorenylmethoxycarbonyl) chemistry using HATU/DIPEA and PEG resin (0.17 mmol g<sup>-1</sup>; Novabiochem) in NMP. DIPEA was added in 4-fold excess with respect to the amino acid and HATU, and the reaction time was extended to 2 h. Fmoc deprotection was carried out using 20 % piperidine in NMP for two 15 min. The synthesis was followed by UV monitoring of the dibenzofulvene released during the Fmoc deprotection. After the synthesis of 7 residue oligopeptide (KLVFFGW) at the C-terminal, coupled with O-(N-Fmoc-2-aminoethyl)-O'-(2-carboxyethyl)-undecaethyleneglycol (Fmoc-NH-PEG<sub>12</sub>-COOH) and 6 residue oligopeptide (GKLVFF) at the N-terminal side was synthesized as the same method. After the final deprotection, 4-fold excess of 5-dimethylamino-1-naphthalene sulfonyl chloride (Dansyl-Cl) was added in 50% DMF/NMP for 2 h. The PEGylated conjugate **1** was cleaved from the resin by treatment with TFA/TIS/H<sub>2</sub>O (95/2.5/2.5) for 3 h following by precipitation with cool diethyl ether. The purification was operated at 4.0 mL·min<sup>-1</sup> using linear A-B gradients in 30 min run time (solvent A, H<sub>2</sub>O containing 0.1 % TFA; solvent B, CH<sub>3</sub>CN containing 0.1 % TFA) at 25°C. The eluted **1** was freeze-dried, and stored at -80°C. Purified **1** was characterized by analytical HPLC (Fig. S1) and MALDI-TOF/MS (Fig. S2): m/z: 2420.57 [M+H]<sup>+</sup> (calcd.: m/z: 2419.96).

##### Analytical HPLC analysis

The purity of **1** was estimated from analytical HPLC reversed-phase high performance liquid chromatography (RP-HPLC; JASCO HPLC system equipment consisting of a JASCO PU-2089i-plus quaternary gradient inert pump, and a JASCO MD-2015plus multiwavelength UV-vis detector) using a ODS column (Inertsil ODS-3, particle size 5  $\mu$ m, pore size 120 Å, 4.6 mm I.D. x 250 mm, GL Science, Tokyo, Japan) running with H<sub>2</sub>O/0.1% TFA (solvent A) and ACN/0.1% TFA (solvent B) gradient (10-25 % B, 20 min) at 1 mL min<sup>-1</sup>, and was > 95%.

##### Sample Preparation

Lyophilized **1** was dissolved in 10 mM phosphate buffer (pH 7.0) at 100  $\mu$ M as a master solution, and stored at -80°C prior to use.

##### UV Spectroscopy

UV measurements were carried out on a UV/Vis spectrophotometer V-560 (JASCO) at 25°C (Jasco ETC-505T peltier thermostat) using 1.0 cm path-length quartz cell (GL science). Band width: 2.0 nm, scan speed: 100 nm/min.

## FRET measurement

Fluorescence spectroscopy was undertaken in order to measure the tryptophan (Trp) emission and FRET spectrum of **1**. 1  $\mu\text{M}$  of **1** in 10 mM phosphate buffer (pH 7.0, total 200  $\mu\text{l}$ ) was prepared from 100  $\mu\text{M}$  stock solution, and measured the fluorescence intensity at 505 nm ( $I_o$ ) using a Jasco spectrometer, model FP-6500 ( $\lambda_{\text{ex}}$  = 290 nm, 3 nm bandwidth each) in a 3 mm path-length quartz cell at 25°C. After the measurements, 2.5  $\mu\text{l}$  of each concentrated dye in 10 mM phosphate buffer (pH 7.0) was added into quartz cell, and one minute later measured the fluorescence intensity ( $I_{\text{add}}$ ) again. The intensity ratio ( $= I_{\text{add}}/I_o$ ) was calculated and evaluated as the inhibitory effect.

## II. Additional data

Analytical HPLC and TOF/MS spectrum of **1**.

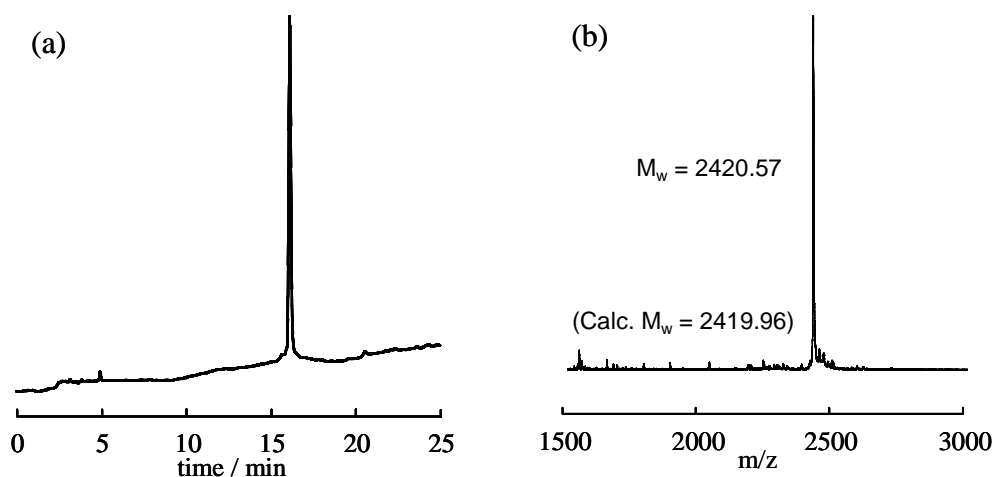

Fig. S1 Analytical HPLC chromatogram (a) and TOF/MS spectrum (b) of **1**.

c.a.c. estimation from UV/Vis spectroscopy

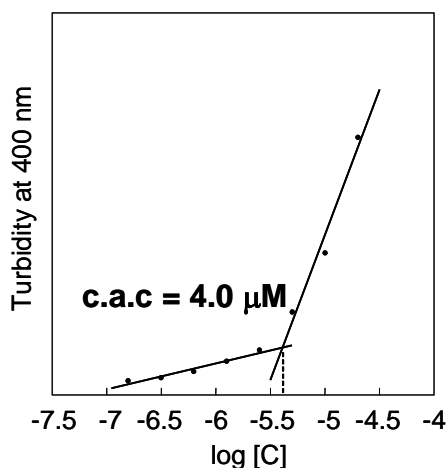

Fig. S2 Concentration dependency on turbidity of **1** in 10 mM phosphate buffer (pH 7.2) at 25°C.

**Time course of FRET fluorescence intensity of 1.**

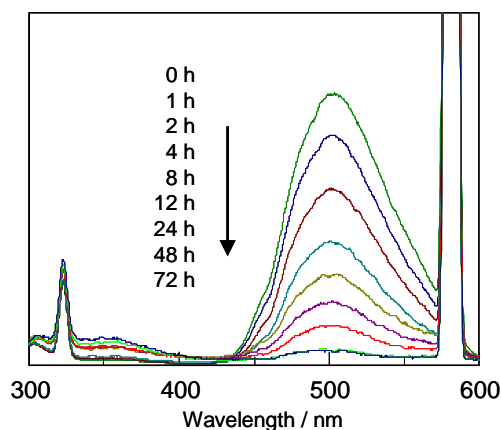

**Fig. S3** Time course of FRET spectra of 1 after preparing the master solution at 25°C. [1] = 1  $\mu$ M.

**Secondary structure of 1 in each concentration.**

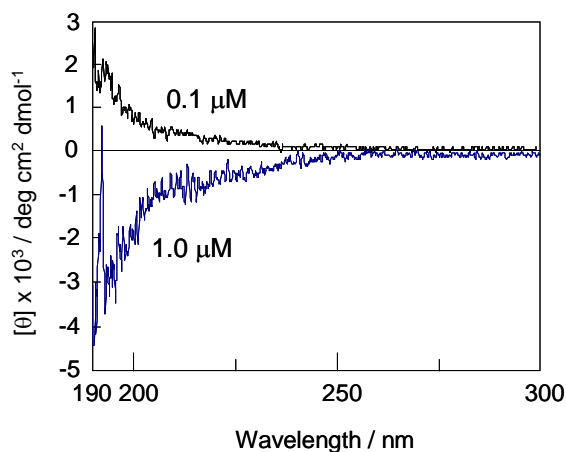

**Fig. S4** CD spectra of 1 in 10 mM phosphate buffer at 25°C.

**Fluorescence intensity of Trp with denaturants.**

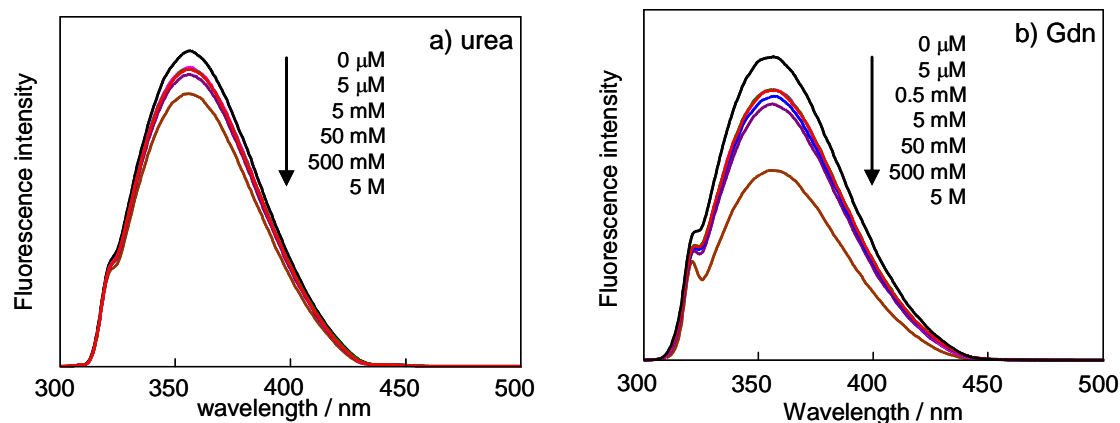

**Fig. S5** Fluorescence spectra of Trp (1  $\mu$ M) with a) urea and b) Gdn in 10 mM phosphate buffer (pH 7.0) at 25 °C.  $\lambda_{\text{ex}}$  = 290 nm.

**Chemical structures of curcumin and blue dyes used in this study.**

**Fig. 6S** Temporal changes of ThT fluorescence intensity at 480 nm ( $\lambda_{\text{ex}} = 442$  nm) with BB-FCF in 50 mM phosphate buffer (pH 7.4) at 37°C. C.  $[\text{A}\beta(1-40)] = 5 \mu\text{M}$ .
